# Supplementary material
Source: PubMed Central journal article supplement (PMC3436069)
Supplement: NIHMS376108-supplement-1.pdf [file NIHMS376108-supplement-1.pdf]

## SUPPLEMENTARY MATERIALS GUIDE

### Tables

**Supplementary Table 1.** Clinical characteristics

**Supplementary Table 2.** *KRAS* assessment

**Supplementary Table 3.** Tumor burden and CEA data

**Supplementary Table 4.** Probabilities that mutations were absent in metastases prior to panitumumab therapy

**Supplementary Table 5.** Wild-type and mutant-specific primers

**Supplementary Table 6.** Total circulating cell-free DNA levels

### Figures

**Supplementary Fig. 1. Ligation and BEAMing assays used to detect circulating *KRAS* mutations.**

**a, b, c,** Each lane represents the results of ligation of one of six independent *KRAS*-specific PCR products, each containing 100 template molecules from the indicated patients' pre-treatment serum samples. The wild-type ligation products contain 6-carboxyfluorescein-labeled oligonucleotide probes that ligate to an unlabeled oligonucleotide only when wild-type alleles are present. The mutant (MUT) ligation products contain hexachlorofluorescein-labeled oligonucleotide probes that ligate to the same unlabeled oligonucleotide only when mutant alleles are present. The fluorescent images of denaturing acrylamide gels in which the ligation products were size-separated are shown. **d, e, f,** *KRAS*-specific PCR products were used as templates for BEAMing in which each template was converted to a bead containing thousands of identical copies of the template<sup>12</sup>. After hybridization to Cy3- or Cy5-labeled oligonucleotide probes specific for wild-type or mutant sequences, respectively, the beads were analyzed by flow cytometry. Beads whose fluorescence spectra lie between the wild-type and mutant-containing beads result from inclusion of both wild-type and mutant templates in the aqueous nanocompartments of the emulsion PCR. See Materials and Methods for additional details. **a, d:** Patient #17; **b, e:** Patient #20; **c, f:** Patient #28. The mutant probes used in **a, b, d,** and **e** were specific for *KRAS* cDNA nt 38A and the mutant probe used in **c** and **f** was specific for *KRAS* cDNA nt 35A. The fraction of beads representing mutant templates are indicated for each patient.

**Supplementary Fig. 2.** Time course of ctDNA, CEA, and tumor burden for all the patients in which ctDNA was detected (other than Patients 1 and 12, which are depicted in Fig. 1). Tumor burden refers to the aggregate cross-sectional diameter of the index lesions.

**Supplementary Fig. 3. Kaplan-Meier Estimates of progression free survival in three groups of patients treated with panitumumab.** (*Black*) patients whose tumors were *KRAS* mutant prior to initiating therapy, (*Red*) patients whose tumors were wild-type for *KRAS* prior to starting therapy with panitumumab and *did not* develop detectable secondary mutation in *KRAS*, and (*Blue*) patients whose tumors were wild-type for *KRAS* prior to starting therapy with panitumumab and *did* develop a detectable mutation in *KRAS*. The progression-free survival was not different among patients who did or did not develop *KRAS* mutations during treatment (Hazard ratio 0.9; 95% CI 0.3366 to 2.453; p=0.85; Log-Rank Test).

### Other

**Supplementary Appendix.** Mathematical modeling

Supplementary Table 1. Clinical characteristics

| Patient # | Clinical and Demographic Info |        |                      |              |                  |                                         | Prior Therapy          |                          |                  |                        |                       | Metastatic lesions prior to Panitumumab therapy | Response to Panitumumab   |                                   |                          |
|-----------|-------------------------------|--------|----------------------|--------------|------------------|-----------------------------------------|------------------------|--------------------------|------------------|------------------------|-----------------------|-------------------------------------------------|---------------------------|-----------------------------------|--------------------------|
|           | Age                           | Gender | ECOG PS <sup>1</sup> | Primary Site | Race/Ethnicity   | Weeks since diagnosis of metastatic CRC | Lines of Prior Therapy | Chemotherapeutic agents  | Biologic Therapy | Surgery (Intent)       | Radiation Therapy     | Number of lesions detectable by CT              | WHO <sup>2</sup> RESPONSE | Progression Free Survival (weeks) | Overall Survival (weeks) |
| 1         | 64                            | M      | 1                    | Colon        | White/Caucasian  | 93                                      | 3                      | Cape, OXAL, IRT          |                  | Resection (Curative)   |                       | 12                                              | SD                        | 33                                | 33                       |
| 2         | 53                            | M      | 0                    | Colon        | White/Caucasian  | 96                                      | 3                      | 5FU, LV, Cape, OXAL, IRT |                  | Resection (Staging)    |                       | 6                                               | PR                        | 22                                | 76                       |
| 3*        | 60                            | M      | 1                    | Colon        | White/Caucasian  | 97                                      | 2                      | 5FU, LV, IRT             |                  | Resection (Curative)   |                       | 3                                               | PD                        | 7                                 | 119                      |
| 4         | 67                            | F      | 0                    | Colon        | African American | 105                                     | 3                      | 5FU, LV, OXAL, IRT       |                  | Bypass (Palliative)    | Pelvis (49 Gy)        | 2                                               | SD                        | 11                                | 51                       |
| 5         | 78                            | F      | 0                    | Colon        | White/Caucasian  | 156                                     | 2                      | 5FU, LV, OXAL, IRT       | Bevacizumab      | Resection (Curative)   |                       | 4                                               | PR                        | 23                                | 97                       |
| 6         | 63                            | F      | 1                    | Colon        | White/Caucasian  | 92                                      | 3                      | 5FU, LV, OXAL, IRT       | Bevacizumab      | Bypass (Palliative)    | Pelvis (58 Gy)        | 4                                               | SD                        | 35                                | 35                       |
| 7         | 55                            | M      | 1                    | Rectum       | White/Caucasian  | 194                                     | 2                      | 5FU, LV, Cape, OXAL, IRT | Bevacizumab      | Resection (Curative)   |                       | 7                                               | SD                        | 23                                | 77                       |
| 8*        | 48                            | F      | 1                    | Colon        | White/Caucasian  | 68                                      | 2                      | 5FU, LV, OXAL, IRT       | Bevacizumab      | Resection (Palliation) |                       | 3                                               | PD                        | 11                                | 50                       |
| 9         | 50                            | M      | 1                    | Rectum       | White/Caucasian  | 115                                     | 2                      | 5FU, LV, Cape, OXAL, IRT |                  | Resection (Palliation) | Pelvis (54 Gy)        | 9                                               | PD                        | 31                                | 86                       |
| 10        | 67                            | M      | 1                    | Colon        | White/Caucasian  | 71                                      | 2                      | 5FU, LV, OXAL, IRT       |                  | Resection (Palliation) |                       | 3                                               | SD                        | 23                                | 113                      |
| 11        | 52                            | M      | 1                    | Rectum       | African American | 48                                      | 2                      | 5FU, LV, OXAL, IRT       |                  |                        | Rectum (65 Gy)        | 9                                               | PD                        | 7                                 | 58                       |
| 12        | 49                            | M      | 0                    | Colon        | White/Caucasian  | 129                                     | 3                      | 5FU, LV, Cape, OXAL, IRT | Bevacizumab      | Resection (Palliation) |                       | 4                                               | SD                        | 23                                | 75                       |
| 13        | 59                            | F      | 1                    | Colon        | White/Caucasian  | 61                                      | 2                      | 5FU, LV, OXAL, IRT       | Bevacizumab      | Resection (Palliation) |                       | 7                                               | SD                        | 23                                | 57                       |
| 14        | 73                            | M      | 0                    | Colon        | White/Caucasian  | 97                                      | 3                      | 5FU, LV, OXAL, IRT       |                  | Resection (Curative)   |                       | 4                                               | PR                        | 23                                | 133                      |
| 15        | 58                            | M      | 0                    | Rectum       | White/Caucasian  | 151                                     | 3                      | 5FU, LV, OXAL, IRT       |                  |                        | Pelvis (51 Gy)        | 14                                              | PR                        | 25                                | 25                       |
| 16        | 72                            | F      | 1                    | Colon        | White/Caucasian  | 86                                      | 3                      | 5FU, LV, Cape, OXAL, IRT |                  | Resection (Curative)   |                       | 5                                               | PR                        | 23                                | 45                       |
| 17        | 57                            | F      | 1                    | Colon        | White/Caucasian  | 67                                      | 2                      | 5FU, LV, OXAL, IRT       | Bevacizumab      | Resection (Curative)   | Pelvis (34Gy)         | 7                                               | PR                        | 31                                | 83                       |
| 18        | 47                            | F      | 0                    | Rectum       | White/Caucasian  | 84                                      | 2                      | 5FU, LV, OXAL, IRT       | Bevacizumab      |                        |                       | 6                                               | PR                        | 28                                | 88                       |
| 19        | 42                            | M      | 0                    | Rectum       | White/Caucasian  | 99                                      | 2                      | 5FU, LV, Cape, OXAL, IRT | Bevacizumab      | Resection (Curative)   | Pelvis/Rectum (49 Gy) | 2                                               | PR                        | 15                                | 120                      |
| 20*       | 56                            | F      | 1                    | Colon        | African American | 62                                      | 2                      | 5FU, LV, OXAL, IRT       | Bevacizumab      | Resection (Curative)   |                       | 5                                               | PD                        | 7                                 | 55                       |
| 21        | 57                            | M      | 0                    | Colon        | White/Caucasian  | 106                                     | 2                      | 5FU, LV, Cape, OXAL, IRT | Bevacizumab      | Resection (Palliation) |                       | 10                                              | SD                        | 15                                | 74                       |
| 22        | 59                            | F      | 1                    | Colon        | White/Caucasian  | 102                                     | 3                      | 5FU, LV, Cape, OXAL, IRT | Bevacizumab      | Resection (Palliation) |                       | 13                                              | SD                        | 15                                | 25                       |
| 23        | 69                            | M      | 1                    | Rectum       | White/Caucasian  | 199                                     | 3                      | 5FU, LV, Cape, OXAL, IRT |                  | Resection (Curative)   | Pelvis (50Gy)         | 9                                               | SD                        | 49                                | 49                       |
| 24        | 57                            | M      | 0                    | Unknown      | African American | 52                                      | 2                      | 5FU, LV, OXAL, IRT       | Bevacizumab      | Resection (Curative)   | Pelvis (50Gy)         | 12                                              | SD                        | 52                                | 52                       |
| 25        | 47                            | F      | 0                    | Colon        | White/Caucasian  | 96                                      | 2                      | 5FU, LV, OXAL, IRT       | Bevacizumab      | Resection (Palliation) |                       | 9                                               | SD                        | 20                                | 67                       |
| 26        | 59                            | F      | 0                    | Colon        | White/Caucasian  | 132                                     | 3                      | 5FU, LV, OXAL, IRT       | Bevacizumab      | Resection (Staging)    |                       | 3                                               | SD                        | 23                                | 130                      |
| 27        | 73                            | M      | 0                    | Rectum       | White/Caucasian  | 134                                     | 3                      | 5FU, LV, Cape, OXAL, IRT | Bevacizumab      | Excision (Curative)    | Pelvis (54Gy)         | 6                                               | SD                        | 23                                | 102                      |
| 28*       | 78                            | F      | 1                    | Colon        | White/Caucasian  | 232                                     | 3                      | 5FU, LV, OXAL, IRT       | Bevacizumab      | Resection (Curative)   |                       | 8                                               | PD                        | 7                                 | 36                       |

\*Denotes patients (#3, 8, 20 and 28) whose tumor tissue was found to be KRAS mutant

<sup>1</sup>ECOG PS - Eastern Cooperative Group Performance Status (0 - Fully active without restriction; 1 - Restricted in physically strenuous activity and able to carry out work of a light or sedentary nature;

2 - Ambulatory and capable of all selfcare but unable to carry out any work activities; 3 - Confined to bed or chair more than 50% of waking hours; 4 - Totally confined to bed or chair; 5 - Dead)

<sup>2</sup>WHO Tumor Response Criteria (SD - Stable Disease; PD - Progressive Disease; PR - Partial Response; CR - Complete Response)

**Supplementary Table 2. KRAS assessments**

| Patient # | Baseline KRAS Status | Circulating Mutant KRAS Status*          |                                                    | Circulating Mutant KRAS (fragments/mL)* |        |        |         |         |         |                           | Time to detection of secondary KRAS mutation (weeks) | Time from detection of secondary KRAS mutation to Disease Progression (weeks) |
|-----------|----------------------|------------------------------------------|----------------------------------------------------|-----------------------------------------|--------|--------|---------|---------|---------|---------------------------|------------------------------------------------------|-------------------------------------------------------------------------------|
|           | Tumor Genotype       | Mutant KRAS Alleles Detected at Baseline | Secondary Circulating Mutant KRAS Alleles Detected | Week 1                                  | Week 5 | Week 9 | Week 13 | Week 17 | Week 25 | Follow-up (week 26 to 52) |                                                      |                                                                               |
| 1         | WT                   | NMD                                      | G12V                                               | NMD                                     | NMD    | NMD    | NMD     | 5       | 43      | 498                       | 17                                                   | 16                                                                            |
|           |                      |                                          | G12C                                               | NMD                                     | NMD    | NMD    | NMD     | 5       | 54      | 431                       |                                                      |                                                                               |
|           |                      |                                          | G12A                                               | NMD                                     | NMD    | NMD    | NMD     | 2       | 17      | 317                       |                                                      |                                                                               |
|           |                      |                                          | G12R                                               | NMD                                     | NMD    | NMD    | NMD     | NMD     | 6       | 36                        |                                                      |                                                                               |
| 2         | WT                   | NMD                                      | NMD                                                | NMD                                     | NMD    | NMD    | NMD     | NMD     | NMD     |                           |                                                      |                                                                               |
| 3         | G12D                 | NMD                                      | NMD                                                | NMD                                     | NMD    | NMD    | NMD     | NMD     | NMD     |                           |                                                      |                                                                               |
| 4         | WT                   | NMD                                      | G12R                                               | NMD                                     | NMD    | NMD    | NMD     | NMD     | NMD     | 4                         | 34                                                   | Concurrent                                                                    |
| 5         | WT                   | NMD                                      | G12D                                               | NMD                                     | NMD    | NMD    | NMD     | NMD     | NMD     | 13                        | 26                                                   | Concurrent                                                                    |
| 6         | WT                   | NMD                                      | NMD                                                | NMD                                     | NMD    | NMD    | NMD     | NMD     | NMD     | NMD                       |                                                      |                                                                               |
| 7         | WT                   | NMD                                      | NMD                                                | NMD                                     | NMD    | NMD    | NMD     | NMD     | NMD     | NMD                       |                                                      |                                                                               |
| 8         | G13D                 | G13D                                     | NMD                                                | 23                                      | NMD    | 100    | 119     |         |         | 385                       |                                                      |                                                                               |
| 9         | WT                   | NMD                                      | NMD                                                | NMD                                     | NMD    | NMD    | NMD     | NMD     | NMD     | NMD                       |                                                      |                                                                               |
| 10        | WT                   | NMD                                      | G12V                                               | NMD                                     | 23     | 46     | 3       | 46      | 12      | 37                        | 5                                                    | 19                                                                            |
| 11        | WT                   | NMD                                      | NMD                                                | NMD                                     | NMD    | NMD    | NMD     | NMD     | NMD     | NMD                       |                                                      |                                                                               |
| 12        | WT                   | NMD                                      | G12C                                               | NMD                                     | NMD    | NMD    | NMD     | NMD     | 25      | 80                        | 25                                                   | Concurrent                                                                    |
|           |                      |                                          | G12A                                               | NMD                                     | NMD    | NMD    | NMD     | 5       | 20      |                           |                                                      |                                                                               |
| 13        | WT                   | NMD                                      | NMD                                                | NMD                                     | NMD    | NMD    | NMD     | NMD     | 0       | NMD                       |                                                      |                                                                               |
| 14        | WT                   | NMD                                      | NMD                                                | NMD                                     | NMD    |        |         | NMD     | 0       | NMD                       |                                                      |                                                                               |
| 15        | WT                   | NMD                                      | G12V                                               | NMD                                     | NMD    | NMD    | NMD     | NMD     |         | 127                       | 22                                                   | Concurrent                                                                    |
| 16        | WT                   | NMD                                      | NMD                                                | NMD                                     | NMD    | NMD    |         | NMD     | NMD     | NMD                       |                                                      |                                                                               |
| 17        | WT                   | NMD                                      | NMD                                                | NMD                                     | NMD    |        | NMD     | NMD     | NMD     | NMD                       |                                                      |                                                                               |
| 18        | WT                   | NMD                                      | NMD                                                | NMD                                     | NMD    | NMD    | NMD     | NMD     | NMD     | NMD                       |                                                      |                                                                               |
| 19        | WT                   | NMD                                      | NMD                                                | NMD                                     | NMD    | NMD    | NMD     | NMD     | NMD     | NMD                       |                                                      |                                                                               |
| 20        | G13D                 | G13D                                     | NMD                                                | 411                                     | 146    |        | 1215    |         |         | 2484                      |                                                      |                                                                               |
| 21        | WT                   | NMD                                      | G12V                                               | NMD                                     | NMD    | NMD    | NMD     |         |         | 16                        | 18                                                   | Concurrent                                                                    |
| 22        | WT                   | NMD                                      | G12S                                               | NMD                                     | NMD    | NMD    | NMD     | 24      |         |                           | 17                                                   | Concurrent                                                                    |
|           |                      |                                          | G12C                                               | NMD                                     | NMD    | NMD    | NMD     | 3       |         |                           |                                                      |                                                                               |
|           |                      |                                          | G12A                                               | NMD                                     | NMD    | NMD    | NMD     | 8       |         |                           |                                                      |                                                                               |
|           |                      |                                          | G12D                                               | NMD                                     | NMD    | NMD    | NMD     | 4       |         |                           |                                                      |                                                                               |
| 23        | WT                   | NMD                                      | NMD                                                | NMD                                     |        | NMD    | NMD     | NMD     | NMD     |                           |                                                      |                                                                               |
| 24        | WT                   | NMD                                      | G12A                                               | NMD                                     | NMD    | NMD    | NMD     | NMD     |         | 3                         | 26                                                   | 29                                                                            |
| 25        | WT                   | NMD                                      | NMD                                                | NMD                                     | NMD    | NMD    | NMD     | NMD     |         |                           |                                                      |                                                                               |
| 26        | WT                   | NMD                                      | NMD                                                | NMD                                     | NMD    | NMD    | NMD     | NMD     | NMD     | NMD                       |                                                      |                                                                               |
| 27        | WT                   | NMD                                      | NMD                                                | NMD                                     | NMD    | NMD    | NMD     | NMD     | NMD     | NMD                       |                                                      |                                                                               |
| 28        | G12D                 | G12D                                     | NMD                                                | 810                                     | 518    | 806    |         |         |         | 984                       |                                                      |                                                                               |

\* NMD = No Mutation Detected in the evaluated sample; blank values represent samples that were not available at the indicated time point

**Supplementary Table 3. Tumor Burden and CEA data**

CEA Levels:

| #  | w0      | w8     | w12    | w16   | w20    | w24    | w32  | w40   | Follow-up |
|----|---------|--------|--------|-------|--------|--------|------|-------|-----------|
| 1  | 4366.0  | 158.0  | 87.0   | 307.0 |        | 1014.0 |      |       | 3279.0    |
| 2  | 3526.0  | 149.0  | 50.0   | 42.0  |        | 122.0  |      |       | 92.0      |
| 3  | 194.2   |        | 268.0  | 364.7 |        |        |      |       | 462.6     |
| 4  | 4.9     | 0.6    |        | 1.8   |        | 2.3    | 4.4  |       | 6.4       |
| 5  | 4.8     | 2.7    | 2.7    | 3.5   |        | 2.7    |      |       | 3.6       |
| 6  | 154.0   | 164.0  | 65.0   | 61.0  |        | 56.0   |      |       | 55.0      |
| 7  | 25.0    | 2.9    | 2.1    | 6.3   |        | 29.0   |      |       | 42.5      |
| 8  | 11.0    | 6.7    | 10.1   |       |        |        |      |       | 36.8      |
| 9  | 43.6    |        | 1.0    |       |        | 1.0    | 1.9  | 4.8   | 10.5      |
| 10 | 40.7    | 7.2    | 5.8    | 8.6   |        | 16.6   |      |       | 9.1       |
| 11 | 16578.0 | 5069.0 | 2015.0 | 864.0 |        | 1217.0 |      |       | 2252.0    |
| 12 | 231.0   | 36.3   | 36.7   | 69.5  | 180.0  | 420.3  |      |       | 756.5     |
| 13 | 51.5    | 5.1    | 6.1    | 6.9   |        | 27.6   |      |       | 53.6      |
| 14 | 33.4    |        |        | 1.3   |        | 1.1    |      |       | 1.8       |
| 15 | 2454.0  | 805.0  | 504.0  | 569.0 | 1164.5 | 1628.0 |      |       | 1584.0    |
| 16 | 389.8   |        | 40.6   | 42.4  |        | 137.6  |      |       | 183.0     |
| 17 | 203.0   | 4.7    | 2.9    | 7.3   |        | 17.5   | 34.5 |       | 169.1     |
| 18 | 352.2   | 31.2   | 23.2   | 22.9  | 34.5   |        |      |       | 114.8     |
| 19 | 1.6     | 1.2    |        | 0.9   |        |        |      |       |           |
| 20 | 190.5   |        | 346.5  |       |        |        |      |       | 521.5     |
| 21 | 27.1    | 4.5    | 5.4    | 515.0 |        |        |      |       | 9.8       |
| 22 | 73.5    | 51.6   | 50.6   | 35.9  |        |        |      |       |           |
| 23 | 133.6   | 36.3   | 19.1   | 15.5  |        | 10.8   | 22.3 |       | 40.4      |
| 24 | 22.6    | 7.4    | 6.6    | 7.1   |        | 9.2    |      |       | 23.3      |
| 25 | 5.9     | 2.5    | 3.4    | 3.4   |        |        |      |       |           |
| 26 | 281.1   | 73.3   |        | 48.7  |        | 43.5   | 60.6 | 116.7 | 164.9     |
| 27 | 13.9    | 3.6    | 3.3    | 3.0   |        | 3.7    | 4.8  |       | 5.8       |
| 28 | 25.8    |        |        |       |        |        |      |       | 19.1      |

Blank cells indicate timepoints for which no data were available

Total cross-sectional area (mm<sup>2</sup>) of index lesions included in disease response assessment

| #  | w0    | w8    | w12   | w16   | w20  | w24   | w32  | w40  | Follow-up |
|----|-------|-------|-------|-------|------|-------|------|------|-----------|
| 1  | 13986 | 9094  | 7950  | 7050  |      | 7752  |      |      | 9907      |
| 2  | 24280 | 9774  | 9249  | 8585  |      | 10820 |      |      | 9212      |
| 3  | 6225  | 5904  | 7968  | 8316  |      |       |      |      |           |
| 4  | 1240  | 204   | 342   | 360   |      | 550   | 594  |      |           |
| 5  | 396   | 144   | 144   | 144   |      | 144   |      |      |           |
| 6  | 13728 | 15865 |       | 9346  |      | 11194 |      |      |           |
| 7  | 3290  | 1949  | 2114  | 2051  |      | 4190  |      |      |           |
| 8  | 1849  | 1849  | 2401  |       |      |       |      |      |           |
| 9  | 5923  |       | 3923  |       |      | 3572  | 3900 |      |           |
| 10 | 1317  | 864   | 862   | 420   |      | 635   |      |      |           |
| 11 | 5649  | 4411  | 3853  | 3506  |      | 3360  |      |      |           |
| 12 | 7631  | 6375  | 4954  | 5236  |      | 7367  |      |      |           |
| 13 | 12351 | 8274  | 8210  | 7612  |      | 7822  |      |      |           |
| 14 | 3310  | 2039  | 1331  | 1265  |      | 2610  | 3386 |      |           |
| 15 | 9657  | 4487  | 3865  |       |      | 3600  |      |      |           |
| 16 | 6619  | 2964  | 2124  | 1911  |      | 3722  |      |      |           |
| 17 | 2102  | 618   | 658   | 792   |      | 735   | 693  |      |           |
| 18 | 12208 | 7757  | 7200  | 5556  | 4994 |       |      |      | 5209      |
| 19 | 748   | 154   |       | 121   |      |       |      |      |           |
| 20 | 1714  | 2300  | 2959  |       |      |       |      |      |           |
| 21 | 4484  | 4082  | 3847  | 3578  |      |       |      |      |           |
| 22 | 38006 | 26596 | 27359 | 28512 |      |       |      |      |           |
| 23 | 5580  | 4282  | 4444  | 4095  |      | 4025  | 3987 |      |           |
| 24 | 3706  | 3594  | 3480  | 3285  |      | 2887  |      |      |           |
| 25 | 2196  | 1749  | 1508  | 1687  | 1909 |       |      |      |           |
| 26 | 6450  | 1864  |       | 1129  |      | 1730  | 2244 | 4620 |           |
| 27 | 2799  | 2181  | 1892  | 1701  |      | 2088  | 2620 |      |           |
| 28 | 1312  | 1698  |       |       |      |       |      |      |           |

Blank cells indicate timepoints for which no data were available

**Supplementary Table 4.** Probability that the indicated mutation was absent prior to panitumumab therapy

| Patient | <i>KRAS</i> mutation | Time (weeks) | <i>p</i> -value ( <i>b</i> =0.25) | <i>p</i> -value ( <i>b</i> =0.15) | <i>p</i> -value ( <i>b</i> =0.35) |
|---------|----------------------|--------------|-----------------------------------|-----------------------------------|-----------------------------------|
| 1       | G12V                 | 25           | 8E-1199                           | 1E-1997                           | 2E-856                            |
| 1       | G12C                 | 25           | 2E-1505                           | 2E-2508                           | 2E-1075                           |
| 1       | G12A                 | 25           | 2E-474                            | 3E-790                            | 5E-339                            |
| 1       | G12R                 | 25           | 7.E-168                           | 2.E-17                            | 2E-1672                           |
| 4       | G12R                 | 34           | 4.E-02                            | 5.E-03                            | 1.E-01                            |
| 5       | G12D                 | 26           | 2.E-223                           | 4E-372                            | 7.E-160                           |
| 10      | G12V                 | 25           | 4E-335                            | 5E-558                            | 1.E-239                           |
| 12      | G12C                 | 25           | 3E-697                            | 1E-1161                           | 3E-498                            |
| 12      | G12A                 | 25           | 5.E-140                           | 6.E-233                           | 3.E-100                           |
| 15      | G12V                 | 22           | 1E-15203                          | 6E-25399                          | 6E-10860                          |
| 21      | G12V                 | 18           | 6E-13378                          | 5E-22296                          | 7E-9556                           |
| 22      | G12S                 | 17           | 6E-32621                          | 9E-54368                          | 7E-23301                          |
| 22      | G12C                 | 17           | 3E-4078                           | 1E-6796                           | 3E-2913                           |
| 22      | G12A                 | 17           | 4E-10874                          | 4E-18123                          | 2E-7767                           |
| 22      | G12D                 | 17           | 2E-5437                           | 7E-9062                           | 4E-3884                           |
| 24      | G12A                 | 26           | 4.E-52                            | 2.E-86                            | 2.E-37                            |

**Supplementary Table 5. Oligonucleotides primers and probes**

| Gene                             | Used for:                                                | 5'-Modification | Mutation            | Sequence (5'-3')*                            |
|----------------------------------|----------------------------------------------------------|-----------------|---------------------|----------------------------------------------|
| <b>PCR Amplification Primers</b> |                                                          |                 |                     |                                              |
| KRAS                             | PCR forward primer                                       | None            | KRAS codons 12 & 13 | GATCATATTCGTCCACAAAATGATTC                   |
| KRAS                             | PCR Reverse Primer                                       | None            | KRAS codons 12 & 13 | TGACTGAATATAAACTTGTGGTAGTTG                  |
| <b>Ligation probes</b>           |                                                          |                 |                     |                                              |
| KRAS                             | WT-specific probe                                        | 6-FAM           | G12S                | TCC CGC GAA ATT AAT ACG AG CTA CGC CACC      |
| KRAS                             | Mutant-specific probe                                    | HEX             | G12S                | CTC TTG CCT AC GCC AGT                       |
| KRAS                             | Common anchoring probe                                   | Phosphate       | G12S                | AGC TCC AAC TAC C GG TGT CCA CTA GTC ATG CTT |
| KRAS                             | WT-specific probe                                        | 6-FAM           | G12R                | TCC CGC GAA ATT AAT ACG AG CTA CGC CACC      |
| KRAS                             | Mutant-specific probe                                    | HEX             | G12R                | CT AC GCC AGG                                |
| KRAS                             | Common anchoring probe                                   | Phosphate       | G12R                | AGC TCC AAC TAC C GG TGT CCA CTA GTC ATG CTT |
| KRAS                             | WT-specific probe                                        | 6-FAM           | G12C                | TCC CGC GAA ATT AAT ACG AG CTA CGC CACC      |
| KRAS                             | Mutant-specific probe                                    | HEX             | G12C                | CTA CGC CAC A                                |
| KRAS                             | Common anchoring probe                                   | Phosphate       | G12C                | AGC TCC AAC TAC C GG TGT CCA CTA GTC ATG CTT |
| KRAS                             | WT-specific probe                                        | 6-FAM           | G12D                | ATG GAG AAC TTG ACG TCC T C CTA CGC CAC      |
| KRAS                             | Mutant-specific probe                                    | HEX             | G12D                | TGCCT +ACGC+C+AT                             |
| KRAS                             | Common anchoring probe                                   | Phosphate       | G12D                | CAG CTC CAA CTAC GG TGT CCA CTA GTC ATG CTT  |
| KRAS                             | WT-specific probe                                        | 6-FAM           | G12A                | ATG GAG AAC TTG ACG TCC T C CTA CGC CAC      |
| KRAS                             | Mutant-specific probe                                    | HEX             | G12A                | CCT ACG C C A G                              |
| KRAS                             | Common anchoring probe                                   | Phosphate       | G12A                | CAG CTC CAA CTAC GG TGT CCA CTA GTC ATG CTT  |
| KRAS                             | WT-specific probe                                        | 6-FAM           | G12V                | ATG GAG AAC TTG ACG TCC T C CTA CGC CAC      |
| KRAS                             | Mutant-specific probe                                    | HEX             | G12V                | CCT ACG CCA A                                |
| KRAS                             | Common anchoring probe                                   | Phosphate       | G12V                | CAG CTC CAA CTAC GG TGT CCA CTA GTC ATG CTT  |
| KRAS                             | WT-specific probe                                        | 6-FAM           | G13D                | ATG GAG AAC TTG ACG TCC T C CTT GCCTACGC     |
| KRAS                             | Mutant-specific probe                                    | HEX             | G13D                | CTT GCCTACGT                                 |
| KRAS                             | Common anchoring probe                                   | Phosphate       | G13D                | CACCAGCTCCAAC GG TGT CCA CTA GTC ATG CTT     |
| <b>BEAMing probes</b>            |                                                          |                 |                     |                                              |
| KRAS                             | Detecting beads containing either WT or mutant sequences | ROX             | G12S                | TGACGATACAGCTAATTCA                          |
| KRAS                             | WT-specific probe                                        | Cy3             | G12S                | TGGAGCTGGTGGCGT                              |
| KRAS                             | Mutant-specific probe                                    | Cy5             | G12S                | TGGAGCTAGTGGCGT                              |
| KRAS                             | Detecting beads containing either WT or mutant sequences | ROX             | G12R                | TGACGATACAGCTAATTCA                          |
| KRAS                             | WT-specific probe                                        | Cy3             | G12R                | TGGAGCTGGTGGCGT                              |
| KRAS                             | Mutant-specific probe                                    | Cy5             | G12R                | TGGAGCTCGTGGCGT                              |
| KRAS                             | Detecting beads containing either WT or mutant sequences | ROX             | G12C                | TGACGATACAGCTAATTCA                          |
| KRAS                             | WT-specific probe                                        | Cy3             | G12C                | TGGAGCTGGTGGCGT                              |
| KRAS                             | Mutant-specific probe                                    | Cy5             | G12C                | TGGAGCTGTGGCGT                               |
| KRAS                             | Detecting beads containing either WT or mutant sequences | ROX             | G12D                | TGACGATACAGCTAATTCA                          |
| KRAS                             | WT-specific probe                                        | Cy3             | G12D                | GGAGCTGGTGGCGTA                              |
| KRAS                             | Mutant-specific probe                                    | Cy5             | G12D                | GGAGCTGATGGCGTA                              |
| KRAS                             | Detecting beads containing either WT or mutant sequences | ROX             | G12A                | TGACGATACAGCTAATTCA                          |
| KRAS                             | WT-specific probe                                        | Cy3             | G12A                | GGAGCTGGTGGCGTA                              |
| KRAS                             | Mutant-specific probe                                    | Cy5             | G12A                | GGAGCTGCTGGCGTA                              |
| KRAS                             | Detecting beads containing either WT or mutant sequences | ROX             | G12V                | TGACGATACAGCTAATTCA                          |
| KRAS                             | WT-specific probe                                        | Cy3             | G12V                | GGAGCTGGTGGCGTA                              |
| KRAS                             | Mutant-specific probe                                    | Cy5             | G12V                | GGAGCTGTTGGCGTA                              |
| KRAS                             | Detecting beads containing either WT or mutant sequences | ROX             | G13D                | TGACGATACAGCTAATTCA                          |
| KRAS                             | WT-specific probe                                        | Cy3             | G13D                | AGCTGGTGGCGTAGGC                             |
| KRAS                             | Mutant-specific probe                                    | Cy5             | G13D                | AGCTGGTGACGTAGGC                             |

\* indicates LNA linkages; red font indicates additional nucleotides appended to the ends of the common anchoring or WT-specific probes. Upon electrophoresis, the extra nt on the 5' end of the WT probes render the WT-specific ligation products larger than the mutant-specific ligation products.

**Supplementary Table 6.** Total circulating cell-free DNA levels (ng/ul)

| Subject | Week 1 | Week 5 | Week 9 | Week 13 | Week 17 | Week 25 | Follow-up (week 26 to 52) |
|---------|--------|--------|--------|---------|---------|---------|---------------------------|
| 1       | 1.43   | 5.23   | 0.10   | 0.60    | 0.27    | 1.09    | 5.07                      |
| 2       | 2.18   | 0.70   | 0.09   | 0.18    | 0.56    |         | 0.26                      |
| 3       | 2.25   | 0.56   | 1.03   | 1.11    |         |         | 3.11                      |
| 4       | 1.12   | 0.34   | 0.32   | 0.09    | 0.08    | 0.20    | 0.16                      |
| 5       | 0.09   | 0.05   | 0.07   | 0.11    | 1.02    |         | 0.56                      |
| 6       | 0.56   | 0.84   | 0.18   | 0.22    | 0.28    |         | 1.94                      |
| 7       | 0.10   | 0.31   | 2.74   | 0.24    | 0.52    |         | 0.16                      |
| 8       | 0.22   | 0.32   | 2.63   | 1.35    |         |         | 15.97                     |
| 9       | 1.17   | 0.14   | 0.12   | 1.12    | 0.30    | 1.85    | 0.30                      |
| 10      | 5.51   | 0.10   | 0.05   | 0.06    | 0.03    | 0.08    | 0.11                      |
| 11      | 2.05   | 0.32   | 0.16   | 0.07    | 0.05    |         | 0.22                      |
| 12      | 0.02   | 0.13   | 0.09   | 0.21    | 0.47    | 0.06    | 1.08                      |
| 13      | 0.13   | 0.08   | 0.16   | 0.06    | 0.14    | 0.12    | 0.12                      |
| 14      | 0.88   | 0.91   |        |         | 0.41    | 0.42    | 0.19                      |
| 15      | 0.95   | 0.25   | 0.75   | 0.74    | 0.94    |         | 2.68                      |
| 16      | 0.02   | 14.39  | 4.05   |         | 0.70    | 0.36    | 0.09                      |
| 17      | 0.09   | 0.21   |        | 0.15    | 0.06    | 0.15    | 0.19                      |
| 18      | 0.20   | 0.66   | 0.08   | 0.74    | 0.42    |         | 0.45                      |
| 19      | 0.31   | 0.14   | 0.32   | 0.40    | 0.42    |         |                           |
| 20      | 0.39   | 0.07   |        | 1.04    |         |         | 0.06                      |
| 21      | 0.39   | 0.39   | 0.07   | 0.05    |         |         | 0.41                      |
| 22      | 0.52   | 0.38   | 0.26   | 0.16    | 0.14    |         |                           |
| 23      | 0.55   |        | 0.17   | 0.08    | 0.27    |         | 0.04                      |
| 24      | 0.32   | 0.79   | 0.28   | 0.07    | 0.04    |         | 0.10                      |
| 25      | 1.38   | 0.07   | 0.22   | 2.06    | 0.37    |         |                           |
| 26      | 0.16   | 1.41   | 0.92   | 1.53    | 0.58    | 0.34    | 0.39                      |
| 27      | 0.52   | 0.12   | 0.07   | 0.07    | 1.70    | 0.17    | 0.62                      |
| 28      | 1.11   | 0.25   | 1.73   |         |         |         | 0.64                      |

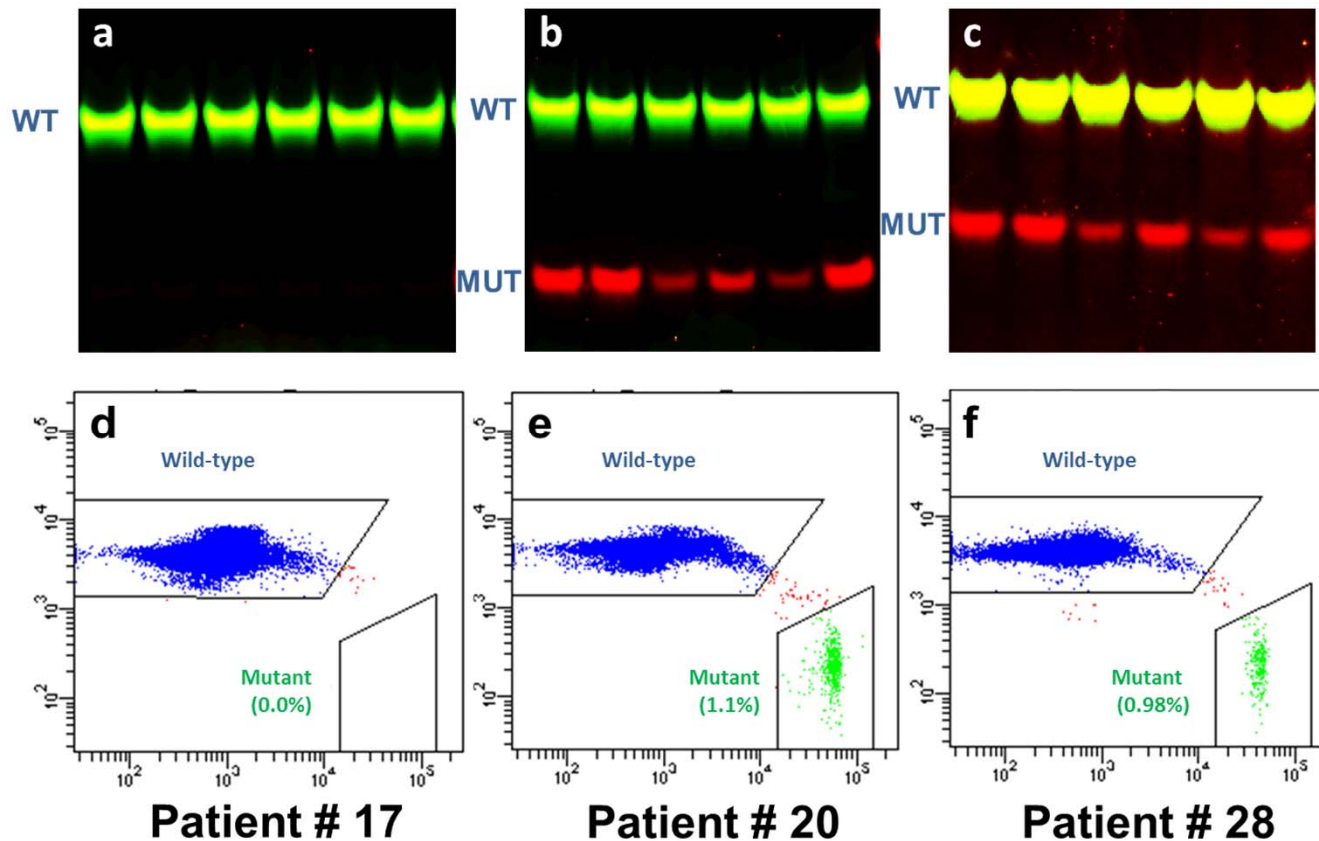

**Supplementary Fig. 1. Ligation and BEAMing assays used to detect circulating *KRAS* mutations.** **a, b, c,** Each lane represents the results of ligation of one of six independent *KRAS*-specific PCR products, each containing 100 template molecules from the indicated patients' pre-treatment serum samples. The wild-type ligation products contain 6-carboxyfluorescein-labeled oligonucleotide probes that ligate to an unlabeled oligonucleotide only when wild-type alleles are present. The mutant (MUT) ligation products contain hexachlorofluorescein-labeled oligonucleotide probes that ligate to the same unlabeled oligonucleotide only when mutant alleles are present. The fluorescent images of denaturing acrylamide gels in which the ligation products were size-separated are shown. **d, e, f,** *KRAS*-specific PCR products were used as templates for BEAMing in which each template was converted to a bead containing thousands of identical copies of the template<sup>12</sup>. After hybridization to Cy3- or Cy5-labeled oligonucleotide probes specific for wild-type or mutant sequences, respectively, the beads were analyzed by flow cytometry. Beads whose fluorescence spectra lie between the wild-type and mutant-containing beads result from inclusion of both wild-type and mutant templates in the aqueous nanocompartments of the emulsion PCR. See Materials and Methods for additional details. **a, d:** Patient #17; **b, e:** Patient #20; **c, f:** Patient #28. The mutant probes used in **a, b, d,** and **e** were specific for *KRAS* cDNA nt 38A and the mutant probes used in **c** and **f** was specific for *KRAS* cDNA nt 35A. The fraction of beads representing mutant templates are indicated for each patient.



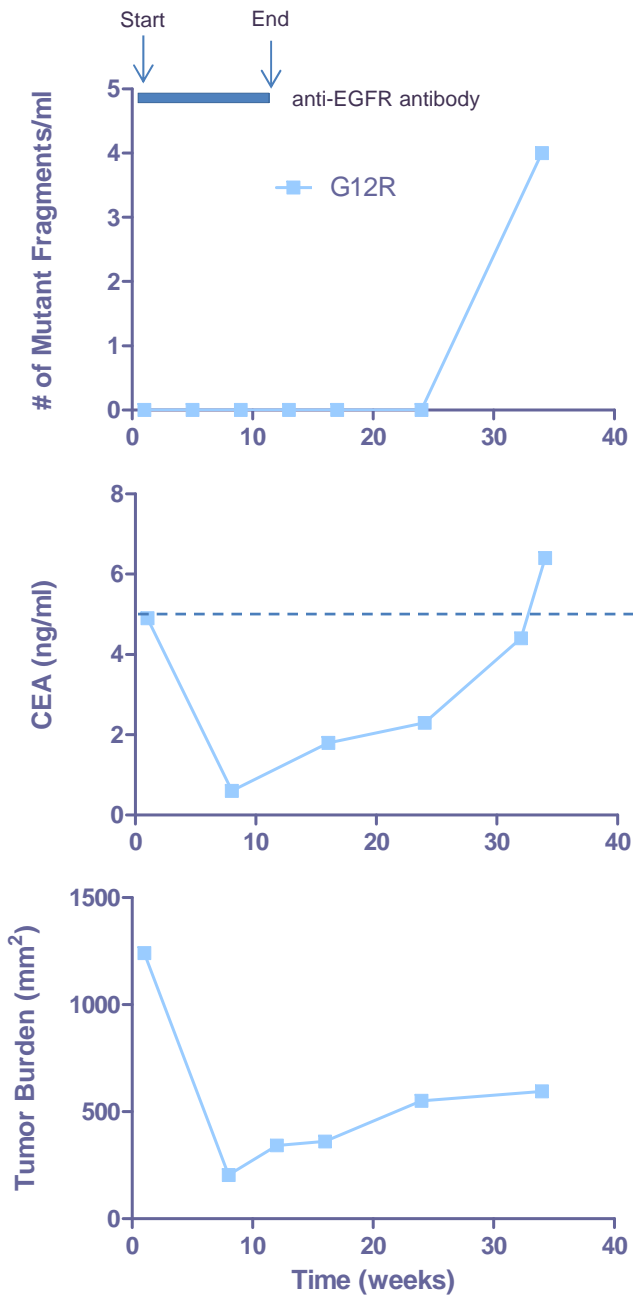

Patient # 4

Baseline KRAS Status: WT

**Supplementary Fig. 2.** Time course of ctDNA, CEA, and tumor burden for all the patients in which ctDNA was detected (other than Patients 1 and 12, which are depicted in Fig. 1). Tumor burden refers to the aggregate cross-sectional diameter of the index lesions.

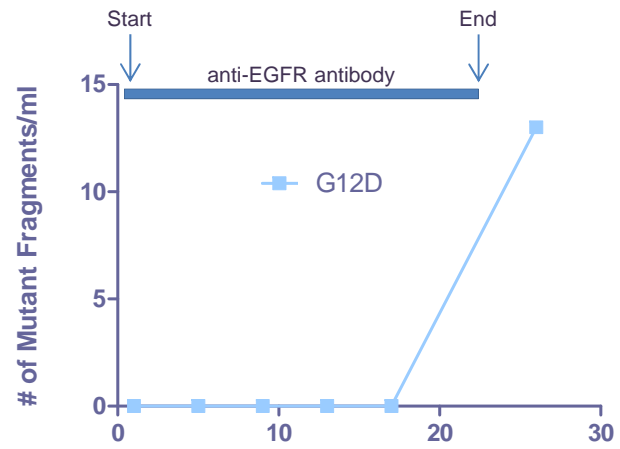

Patient # 5

Baseline KRAS Status: WT

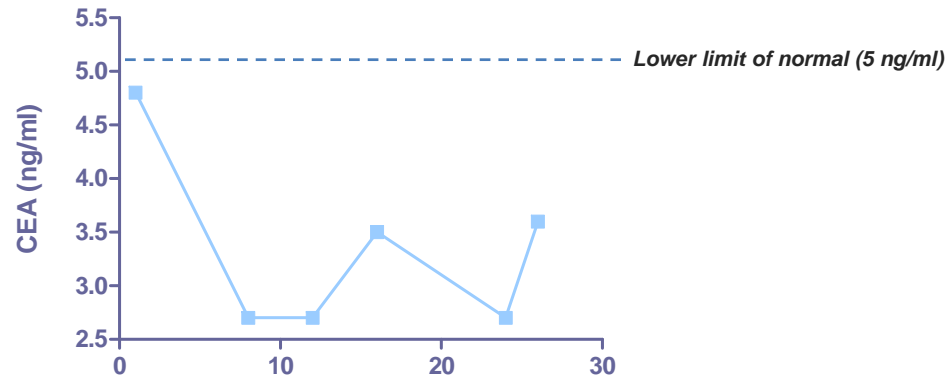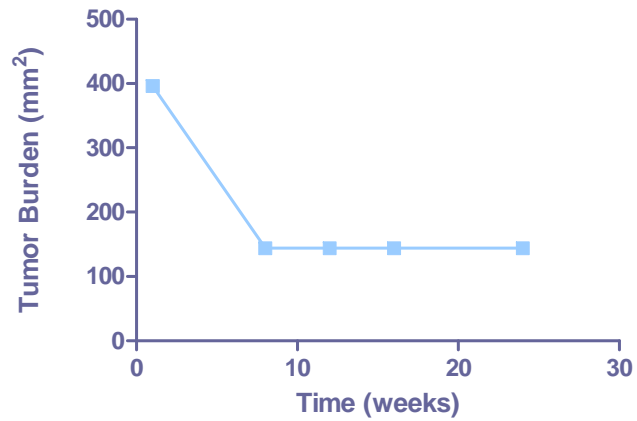

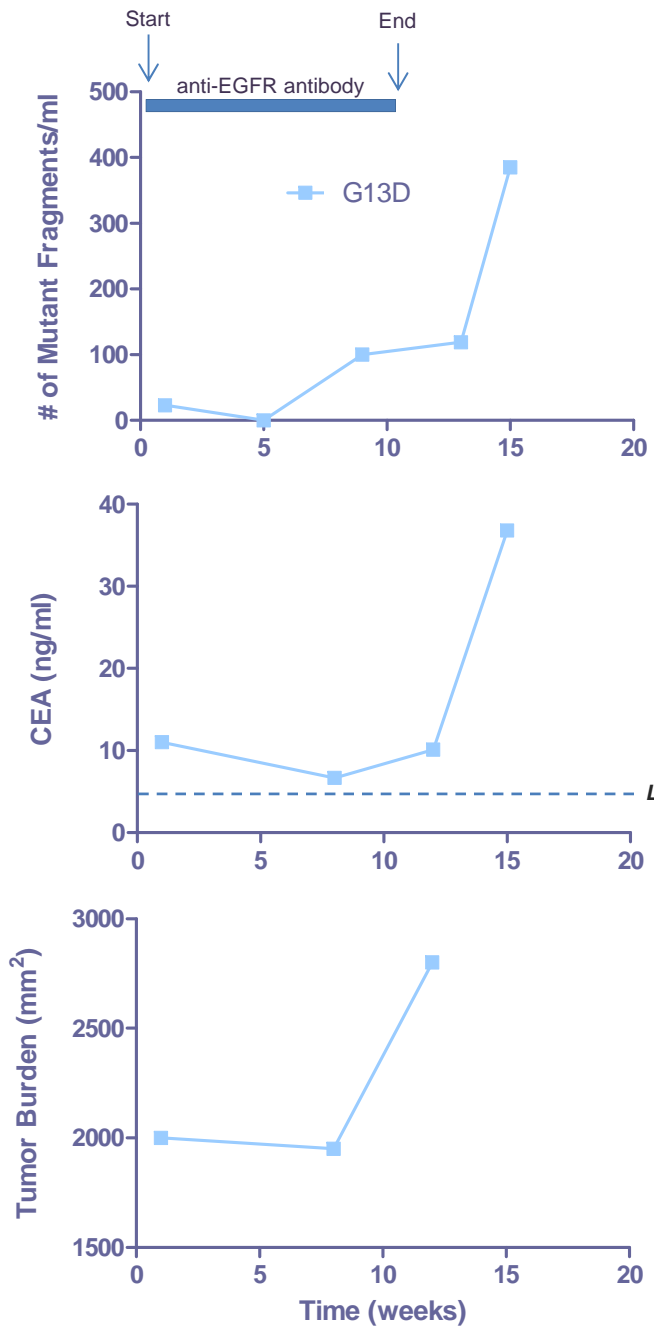

Patient # 8

Baseline KRAS Status: Mutant

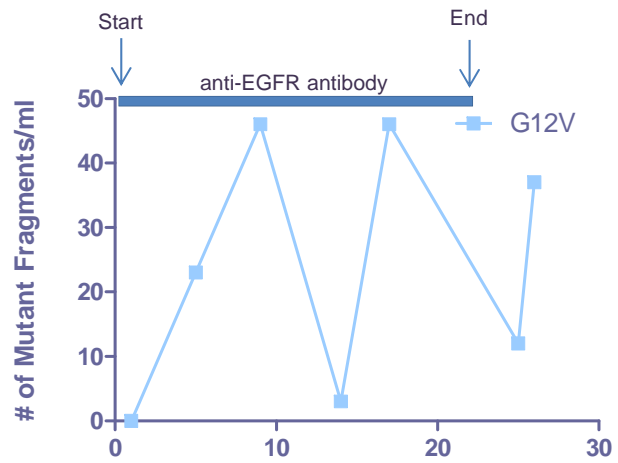

Patient # 10

Baseline KRAS Status: WT

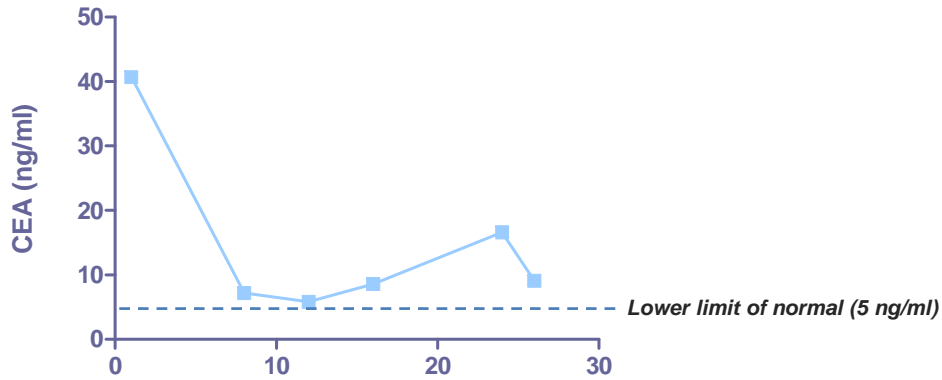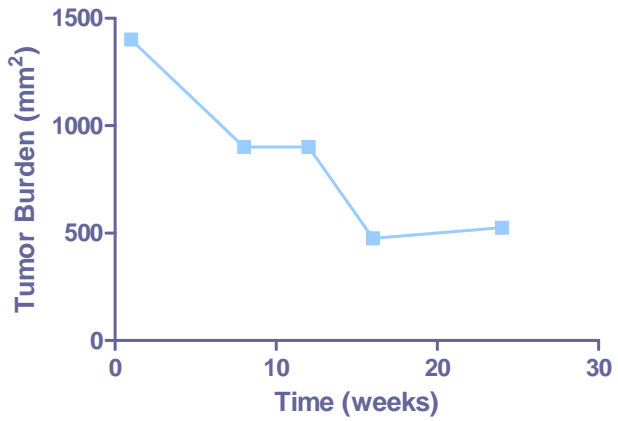

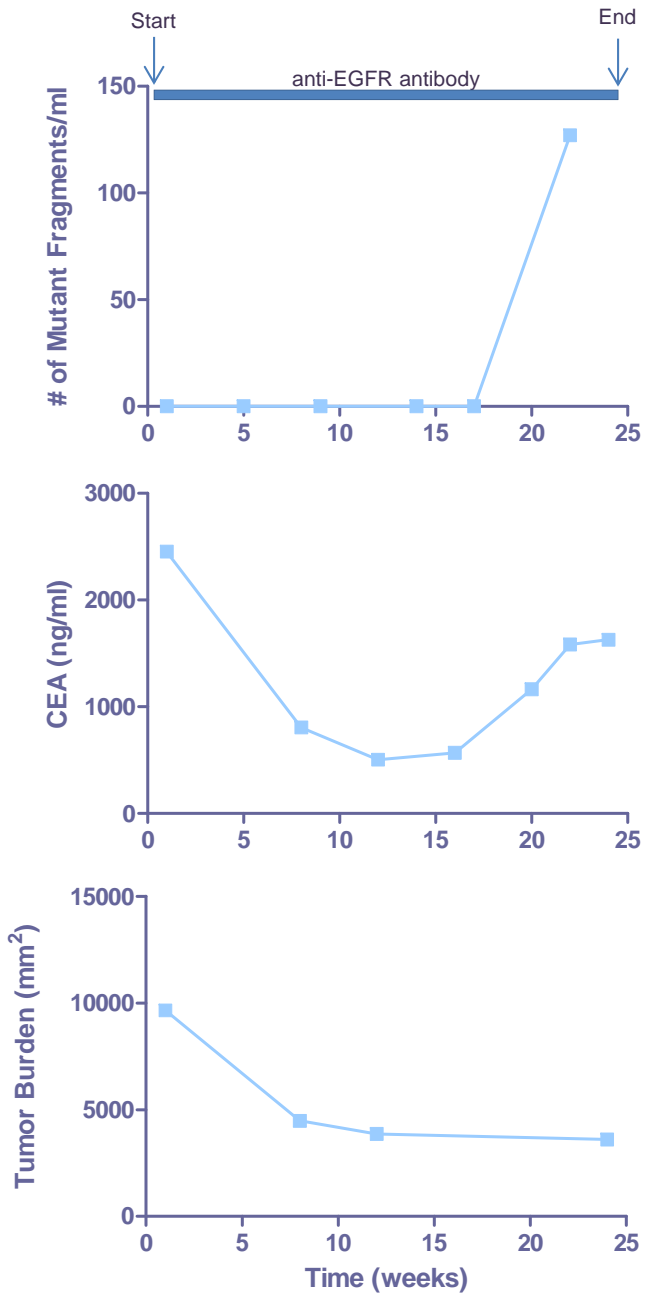

Patient # 15

Baseline KRAS Status: WT

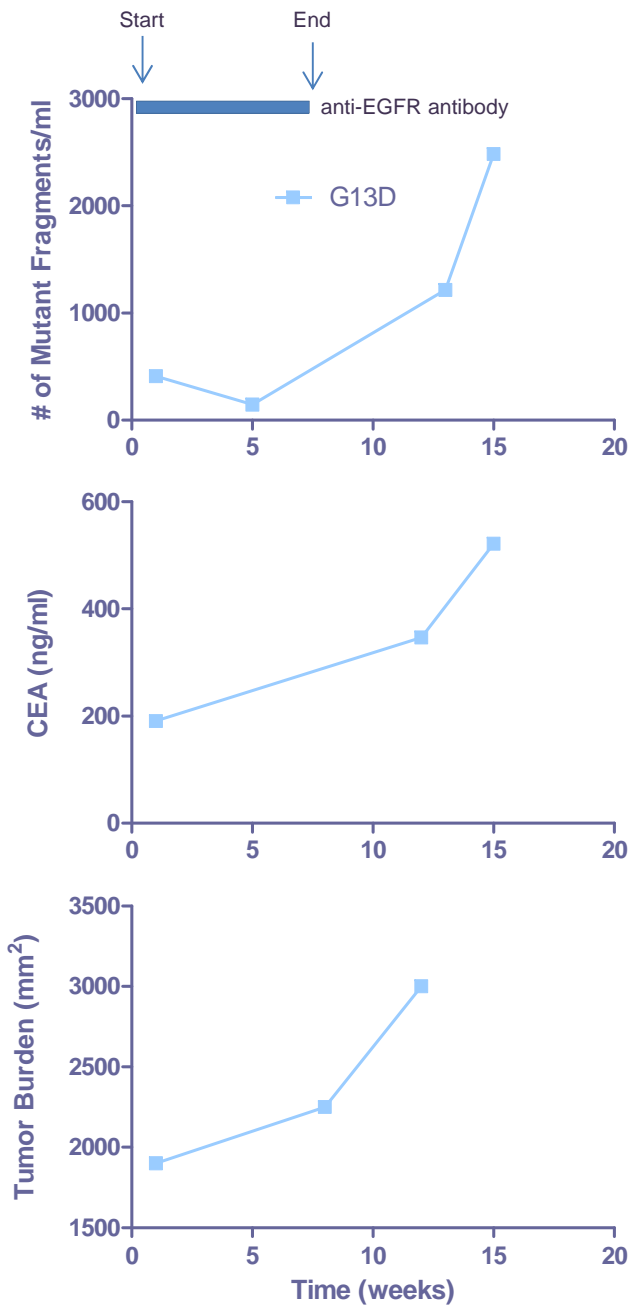

Patient # 20

Baseline KRAS Status: Mutant

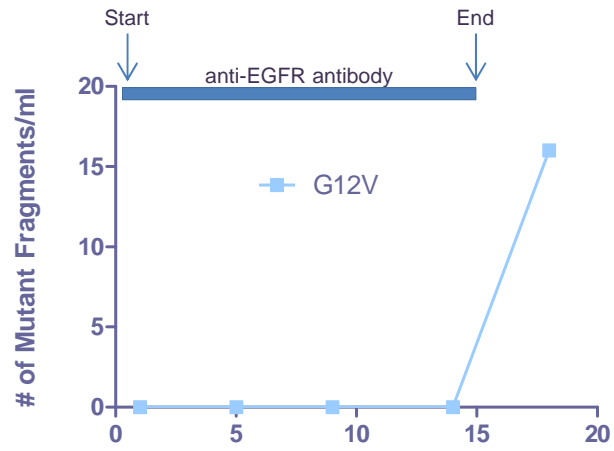

Patient # 21

Baseline KRAS Status: WT

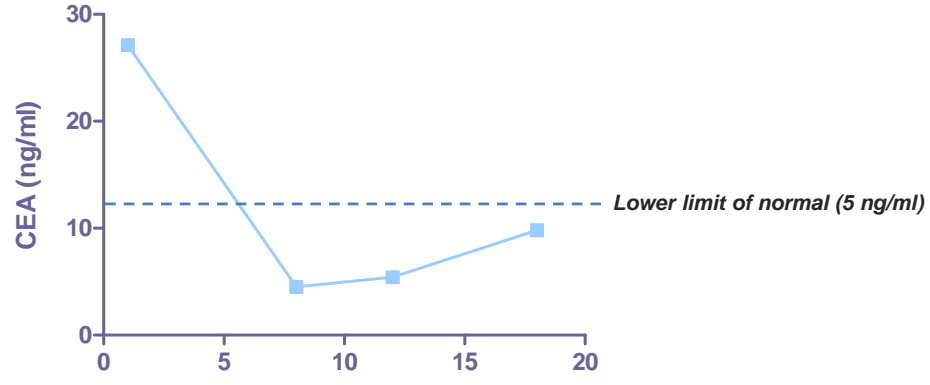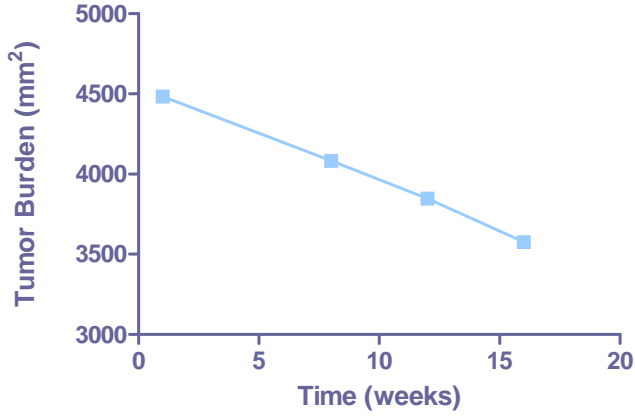

Patient # 22

Baseline KRAS Status: WT

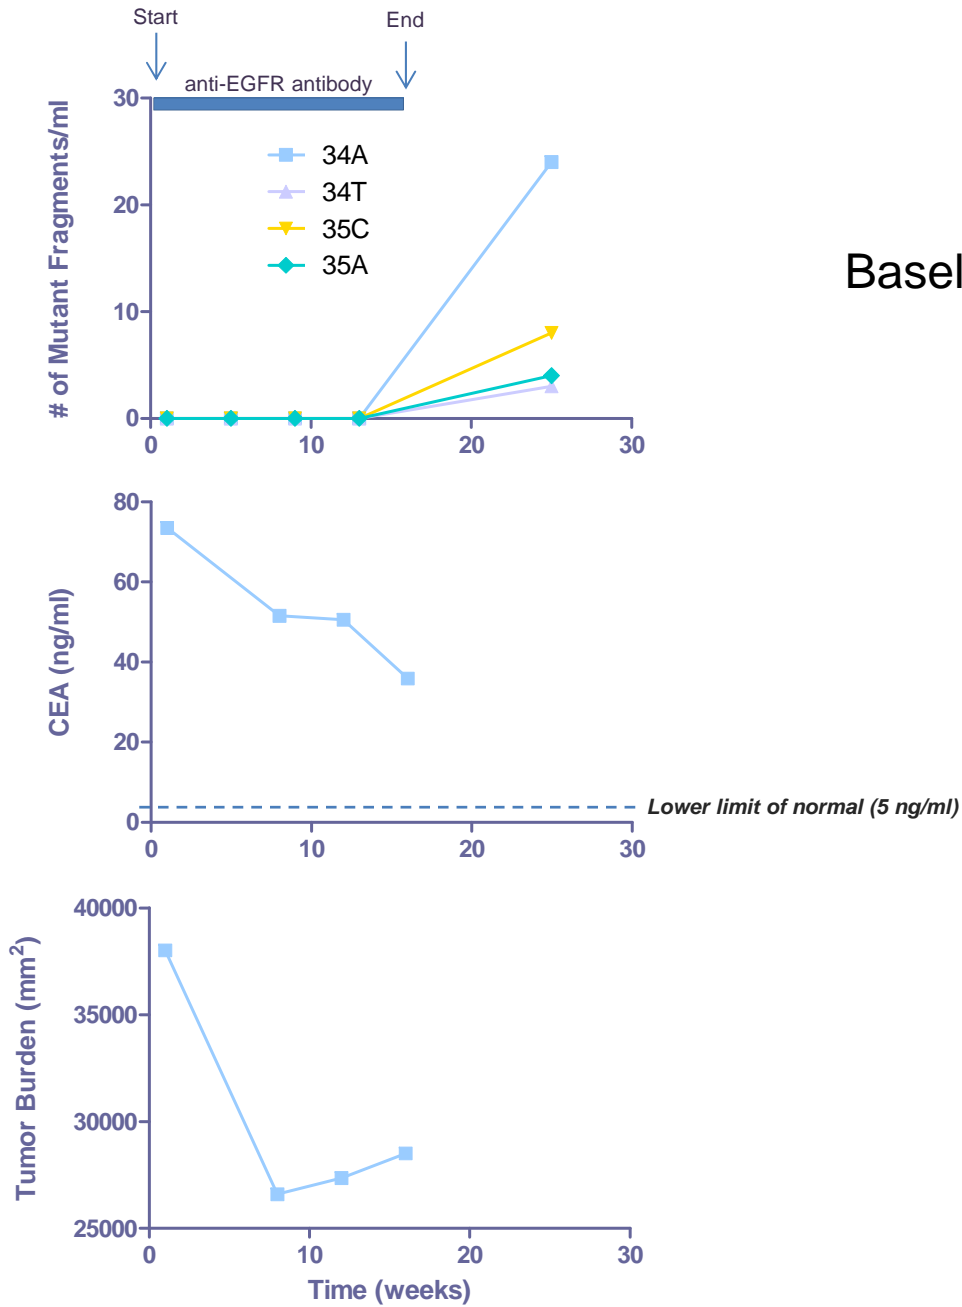



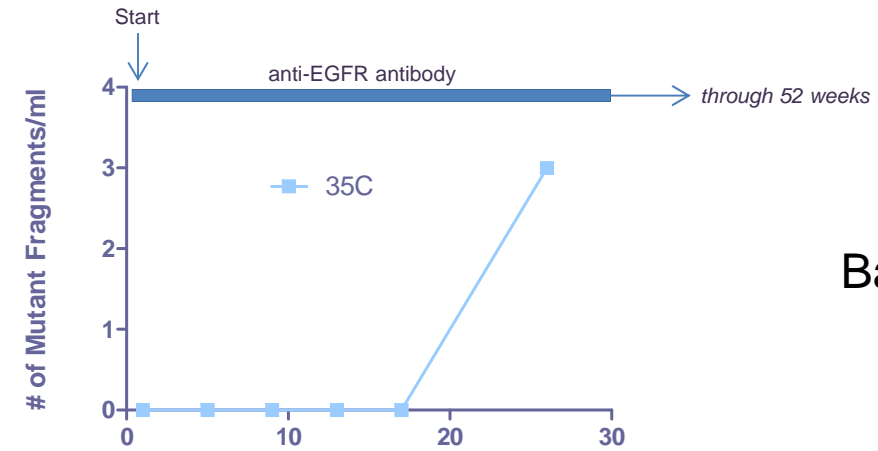

Patient # 24

Baseline KRAS Status: WT

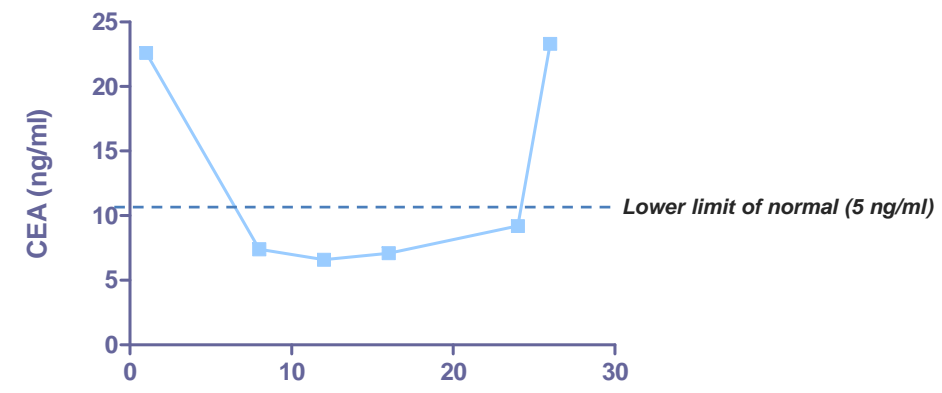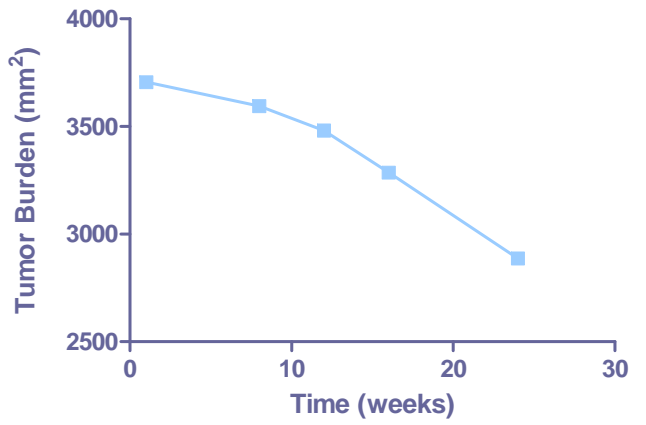

Patient # 28

Baseline KRAS Status: Mutant

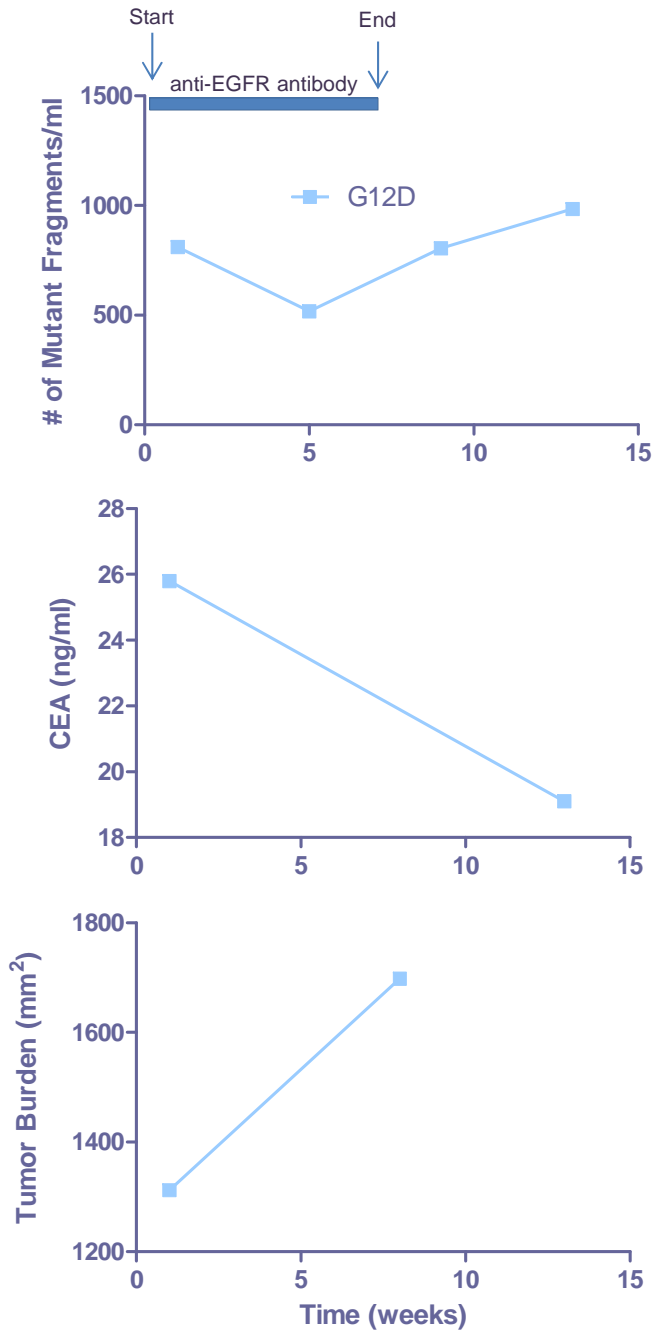

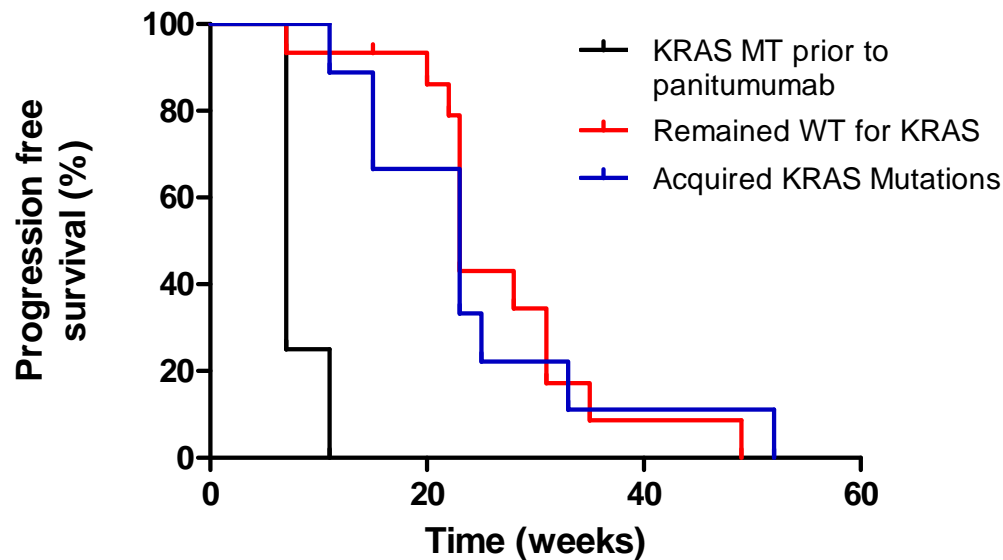

**Supplementary Fig. 3. Kaplan-Meier Estimates of progression free survival in three groups of patients treated with panitumumab.** (*Black*) patients whose tumors were *KRAS*-mutant prior to initiating therapy, (*Red*) patients whose tumors were wild-type for *KRAS* prior to starting therapy with panitumumab and *did not* develop detectable secondary mutation in *KRAS*, and (*Blue*) patients whose tumors were wild-type for *KRAS* prior to starting therapy with panitumumab and *did* develop a detectable mutation in *KRAS*. The progression-free survival was not different among patients who did or did not develop *KRAS* mutations during treatment (Hazard ratio 0.9; 95% CI 0.3366 to 2.453;  $p=0.85$ ; Log-Rank Test).

# Supplementary Appendix

## 1 Statistical test to confirm presence of KRAS-mutated cells at start of treatment

We are interested in the question of whether there were pre-existing KRAS-mutated cells at the time that treatment was started. We take the case that KRAS-mutated cells were absent at the start of treatment as our null hypothesis  $H_0$ ; the alternative hypothesis  $H_1$  is that they were present.

We use a branching process model, described below, to test the null hypothesis. We perform this test separately for each KRAS mutation in each patient. Using our model, we compute an upper bound on the probability  $\Pr[\Theta|H_0]$ , where  $\Theta$  is the event that a number of KRAS-mutated cells greater or equal to the observed number are present in the tumor at the time of observation. We use  $\Pr[\Theta|H_0]$  as a  $p$ -value for this test. We reject  $H_0$  if  $\Pr[\Theta|H_0] < 0.05$ .

### 1.1 Branching process model

We model the dynamics of KRAS-mutated cells by a branching process (Coldman and Goldie, 1983, 1986; Iwasa et al., 2006) with birth rate  $b$  and death rate  $d$ . We let  $\tilde{X}_t$  denote the number of KRAS-mutated cells conditioned on nonextinction of this population. A result of Durrett and Moseley (2010) implies that, as  $t \rightarrow \infty$ , the quantity  $e^{-(b-d)t}\tilde{X}_t$  converges to a random variable  $V$ , where  $V$  is exponentially distributed with mean  $b/(b-d)$ .

Using this result, we can write

$$\Pr[\tilde{X}_t \geq N] \approx \Pr[V \geq e^{-(b-d)t}N] = \exp\left(-\frac{b-d}{b}e^{-(b-d)t}N\right),$$

where the approximation is accurate for large  $t$ . We conclude that

$$\Pr[\Theta|H_0] \leq \exp\left(-\frac{b-d}{b}e^{-(b-d)T}N\right),$$

where  $T$  is the time at which the number of KRAS-mutated cells,  $N$ , is measured.

## 1.2 Estimation of parameter values

We use the observed data to estimate the growth rate,  $b - d$ , of KRAS-mutated cells. This growth rate is equal to the change in the log number of cells per unit time. We therefore estimate this growth rate as

$$b - d \approx \frac{\text{total change in log number of cells}}{\text{total change in time}}.$$

To compute this average, we used the data from Patients 1 and 12, for which there were multiple KRAS mutations that were observed to grow over the course of two or more measurements. This yielded an estimate of  $b-d \approx 0.069$  as average growth rate of KRAS-mutated cells per day. We also computed the growth rates separately for each lesion in Patients 1 and 12.

We initially assume  $b = 0.25$ , which corresponds to one cell division every four days, and obtain  $d$  from the estimated value of  $b - d$ . We also repeat our analysis for  $b = 0.15$  and  $b = 0.35$  to test the sensitivity of our results to this parameter.

As described in the main text, we estimate that each KRAS-mutated fragment detected per milliliter of blood corresponds to  $4.4 \times 10^7$  KRAS-mutated cells.

## 2 Probability that resistant cells exist at start of treatment under generalized Luria-Delbrück distribution

To complement the above hypothesis tests, we also calculate the probability that resistant cells exist at the start of treatment, under a Luria-Delbrück distribution generalized to incorporate cell death (Dewanji et al., 2005). This distribution assumes a particular model of tumor development, in which the

population of sensitive cells grows exponentially, and resistance mutations arise stochastically. A slower pattern of growth (but still leading to the same tumor size at the start of treatment) would be expected to yield more resistance mutations (Luebeck and Moolgavkar, 1991). In contrast, the hypothesis tests described above make no assumptions on the dynamics of the sensitive cell population.

From this point forward we use the following notation and parameter values (unless otherwise specified):

- $M = 10^9$  is number of tumor cells at the start of treatment,
- $b = 0.25$  is the division rate of both sensitive and resistant cells,
- $d = 0.181$  is the death rate, so that the growth rate is  $b - d = 0.069$  (as inferred above from the observed dynamics of circulating KRAS-mutated fragments),
- $u = 42 \times 10^{-9}$  is the total rate at which resistance mutations are generated (assuming 42 possible mutations conferring resistance, as estimated in the main text, and a mutation rate of  $10^{-9}$  per cell division).

Using the generalized Luria-Delbrück distribution proposed by Dewanji et al. (2005; or equivalently, the formulas of Iwasa et al., 2006), we calculate the likelihood that no resistant cells exist prior to treatment to be  $4 \times 10^{-33}$ . Thus, under this model, resistance is almost certainly present at the start of treatment.

### 3 Distribution of waiting times until resistance can be detected

This generalized Luria-Delbrück distribution can also be used to obtain the distribution of waiting times until resistance mutations become detectable in circulating DNA. To obtain this distribution, we first used the methods of Dewanji et al. (2005) to numerically calculate the size distribution of the resistant cell population at the start of treatment. We then assume that the resistant cell population grows exponentially (deterministically) once treatment starts. This deterministic assumption is justified since, for the above parameter values, the number of resistant cells at the start of treatment is

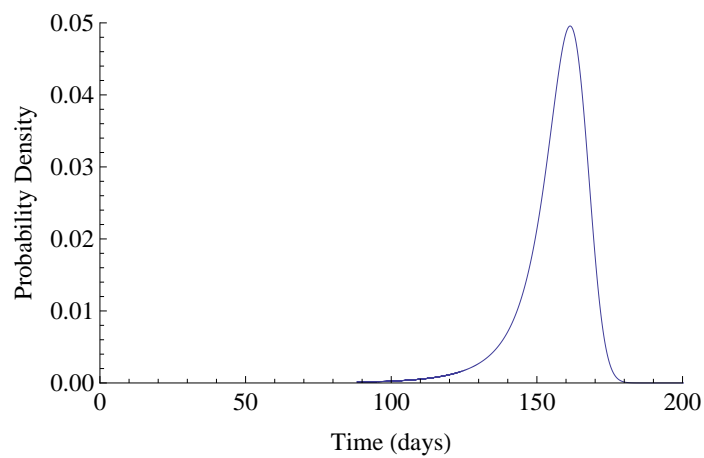

Figure 1: Predicted probability distribution of times from when treatment starts until resistance mutations become observable in circulating DNA. Predictions are based on the Lea-Coulson model with death introduced by Dewanji et al. (2005), or equivalently, the branching process model of Iwasa et al. (2006). Tumor growth rates were inferred from the growth in observed KRAS fragments over time in different lesions; otherwise, parameters were not fit to the data.

likely to be large. (For instance, there is a 99% chance that there are at least 276 resistant cells when treatment starts.) We used  $4.4 \times 10^7$  for the number of resistant cells for which resistance mutations become observable in circulating DNA.

The resulting distribution has a mean of 156 days (22 weeks), with a standard deviation of 11 days. The 95% confidence interval spans from 126 days (18 weeks) to 172 days (25 weeks). The probability density function for this distribution is plotted in Figure 1.

Our analytic results were confirmed through simulation of the birth-death branching process with mutation (Coldman and Goldie, 1986; Iwasa et al., 2006), using the above parameter values. In these simulations, the exact branching process is followed for clonal populations smaller than  $10^4$ , and deterministic exponential growth approximations are used for larger populations. These simulations yielded a mean of 157 days and a standard deviation of 12 days for the waiting time until resistance become detectable.

These results are a close match to the observed data, in which resistance mutations were first observed at Week 17 in some cases and Week 25 in others. In particular, the sharpness of this distribution helps explain the striking similarity, across patients and lesions, in the times at which resistance mutations become detectable.

To incorporate the possibility that not all cells in a lesion are actively dividing, we repeated this analysis using  $M = 10^8$  as the number of actively dividing tumor cells at the start of treatment (one-tenth of the total number of cells in a detectable lesion). This yielded an expected time of 200 days (29 weeks), with a standard deviation of 17 days. The assumption that all (or almost all) tumor cells are actively dividing—that is,  $M = 10^9$  as above—better fits the observed data.

## 4 Size of the largest clonal subpopulation of resistant mutants

Next we obtain an analytical estimate for the size of the largest clonal subpopulation of resistant cells. We assume that the largest clonal subpopulation is the progeny of the first resistance mutation to arise and survive stochastic drift. This is reasonable, since resistance mutations beyond the first are likely to arise significantly later, after this first subpopulation has grown



substantially.

We use the result of Iwasa et al. (2006) that the collection of tumor sizes at which resistance mutations are produced can be viewed as a homogenous Poisson process on  $[1, M]$  with intensity  $u/(1 - d/b)$ . Each such mutation survives stochastic drift with probability  $1 - d/b$ , so the tumor sizes at which mutations that survive stochastic drift arise are produced can be viewed as a Poisson process on  $[1, M]$  with intensity  $u$ . Since  $M$  is large and  $u$  is small, we can replace the interval  $[1, M]$  by  $[0, M]$ , without losing much accuracy.

Let  $M_1$  denote the size of the tumor when the first mutation that survives stochastic drift is produced. Then  $M_1$  is exponentially distributed with mean  $u^{-1}$  (since  $M_1$  corresponds to the first event in a Poisson process with intensity  $u$ ). By the time that the total tumor cell population reaches size  $M$ , the size of the clonal subpopulation initiated by this mutation can be approximated by  $MV/M_1$ , where  $V$  is an exponentially distributed random with mean  $b/(b - d)$ . (This follows from the results of Durrett and Moseley, 2010.)

Let  $Y_1$  denote the size of the clonal subpopulation initiated by the first mutation that survives stochastic drift, conditioned on  $M_1 \leq M$  (i.e., this mutation arises before the tumor reaches size  $M$ ). Using the above results, we obtain the cumulative distribution function  $F(y)$  of  $Y_1$  by

$$\begin{aligned}
1 - F(y) &= \Pr[Y_1 \geq y] \\
&\approx \Pr \left[ \frac{MV}{M_1} \geq y \mid M_1 \leq M \right] \\
&= \int_{z=0}^M \text{Prob. Density} [M_1 = z \mid M_1 \leq M] \times \Pr \left[ V \geq \frac{yz}{M} \right] dz \\
&= \int_{z=0}^M \frac{ue^{-zu}}{1 - e^{-Mu}} \exp \left( -\frac{yz}{M} \frac{b-d}{b} \right) dz \\
&= \frac{u}{1 - e^{-Mu}} \int_{z=0}^M \exp \left( -z \left( u + \frac{y}{M} \frac{b-d}{b} \right) \right) dz \\
&= \frac{Mu}{1 - e^{-Mu}} \left( Mu + y \frac{b-d}{b} \right)^{-1} \left( 1 - \exp \left( -Mu - y \frac{b-d}{b} \right) \right).
\end{aligned}$$

The expected size of this clonal subpopulation can be calculated as

$$E[Y_1] \approx \int_0^M yF'(y) dy \approx 2237,$$

for the given parameter set. Simulations of the birth-death branching process (as described in Section 3 above) confirmed the size of the largest clone to be  $\sim 2300$ .

We can compare this to the total expected number of resistant mutants,  $E[Y]$ , which can be calculated using Eqn. (13) of Dewanji et al. (2005) or Eqn. (10) of Iwasa et al. (2006):

$$E[Y] \approx 3241.$$

Thus most (69%) of the resistant population is comprised of a single clonal type.

We can also vary the number of possible mutations conferring resistance by varying  $u$ ; for example, in the case of four mutations conferring resistance we would use  $u = 4 \times 10^{-9}$ . The results are shown in the following table:

| Number of mutations<br>conferring resistance | $E[Y_1]$ | $E[Y]$ | $E[Y_1]/E[Y]$ |
|----------------------------------------------|----------|--------|---------------|
| 4                                            | 252      | 309    | 81%           |
| 10                                           | 584      | 772    | 76%           |
| 42                                           | 2237     | 3241   | 69%           |
| 100                                          | 4575     | 7717   | 65%           |

## References

- Coldman, A. J., and J. H. Goldie. 1983. A model for the resistance of tumor cells to cancer chemotherapeutic agents. *Mathematical Biosciences* 65:291–307.
- . 1986. A stochastic model for the origin and treatment of tumors containing drug-resistant cells. *Bulletin of Mathematical Biology* 48:279–292.
- Dewanji, A., E. Luebeck, and S. Moolgavkar. 2005. A generalized luria–delbrück model. *Mathematical Biosciences* 197:140–152.
- Durrett, R., and S. Moseley. 2010. Evolution of resistance and progression to disease during clonal expansion of cancer. *Theoretical Population Biology* 77:42 – 48.

- Iwasa, Y., M. A. Nowak, and F. Michor. 2006. Evolution of resistance during clonal expansion. *Genetics* 172:2557–2566.
- Luebeck, E. G., and S. H. Moolgavkar. 1991. Stochastic analysis of intermediate lesions in carcinogenesis experiments. *Risk Analysis* 11:149–157.
